# Supplementary material
Source: Springer Nature journal article supplement (https://www.springerprofessional.de/resource/supplementary/40702_2017_320_MOESM1_ESM.pdf/12236582)
Supplement: MOESM1 [file 12236582]

## Onlinematerial Stelleninserate zum Chief Digital Officer (CDO)

Insgesamt konnten im Beobachtungszeitraum im deutschsprachigen Raum 18 Stellenausschreibungen identifiziert werden, von denen fünf nicht zur Analyse verwendet wurden, da der Jobtitel den Begriff „Chief Digital Officer“ zwar beinhaltet hatte, allerdings Zusätze wie „Referent des“, „Personal Assistant“ oder „Executive Assistant to the“ davorgestellt waren. Im Folgenden stehen alle 18 Inserate zur Verfügung. Jene fünf Inserate, die auf Grund ihrer Zusätze von der Analyse ausgenommen wurden, sind am Ende des Dokumentes zu finden.

## Leitung Digital / Chief Digital Officer

[< zurück zur Übersicht](#)

Der NEOS Parlamentsklub sucht eine\_n Chief Digital Officer (CDO), die/der direkt der Geschäftsführung unterstellt ist. Du bist dabei verantwortlich für die Weiterentwicklung der Digitalen Strategie und zugehöriger Technologien sowie Plattformen im Rahmen der NEOS Gesamt-Kommunikationsstrategie. Als digitaler Kommunikationsprofi mit Projektmanagement-, Umsetzungs- und Führungserfahrung musst du dich dabei in komplexen Strukturen und wechselhaftem Umfeld sicher bewegen, einen klaren Blick behalten und gerne selbst in die Umsetzung gehen.

### Deine Aufgaben:

- Planung, Umsetzung, Koordination sowie laufende Weiterentwicklung aller digitalen Projekte
- Strategische Entwicklung und Betreuung der Website sowie interner Plattformen
- Controlling inklusive Kostenverantwortung, kennzahlenbasiertes Projekt-Monitoring
- Projektmanagement inkl. Erstellung von Pflichtenheften/Spezifikationen und Qualitätssicherung
- Koordination/Integration digitaler Strukturen anderer NEOS-Entitäten
- Kommunikation mit externen Umsetzungspartnern und Agenturen

### Wir suchen:

- Erfahrung in der Konzeption, Planung und Umsetzung digitaler Projekten & Kampagnen
- Umfassende, agile Projektmanagement-Fähigkeiten in Theorie und Praxis
- Solides Verständnis aller relevanten Technologien (Online, Social Media)
- User Experience (inkl. Usability, Barrierefreiheit) und Entwicklersicht (grundlegendes techn. Verständnis)
- Verständnis für Werbeformen (Google Adwords, Facebook Ads, Banner) sowie Google Analytics/SEO
- Verlässliche, eigenständige und strukturierte Arbeitsweise
- Teamfähigkeit, Durchsetzungsstärke und Kommunikationsfreude

### Wir bieten:

- Mitgestaltung der politischen Kommunikation bei NEOS
- Flexible Arbeitsumgebung mit Gestaltungsmöglichkeiten
- Abwechslungsreiche Aufgabengebiete
- Mitarbeit im innovativsten Parlamentsklub
- Arbeiten im Herzen des österreichischen Politikgeschehens
- Motiviertes Team von Anpackern und Umsetzern

Dienstverhältnis: Vollzeit (auf 40-Stunden-Basis)

Dienstort: NEOS Parlamentsklub (Wien)

Dienstantritt: ab Mai 2015

Gehalt: 3.500,- brutto pro Monat mit Bereitschaft zur Überzahlung bei entsprechender Qualifikation

Bewerbungen per Mail inkl. Motivationsschreiben und Lebenslauf bitte bis spätestens Montag, 21. März 2016 an [jobs@neos.eu](mailto:jobs@neos.eu).

[< zurück zur Übersicht](#)

Ringier ist das grösste international operierende Schweizer Medienunternehmen und führt weltweit mit seinen rund 7'500 Mitarbeitenden mehr als 120 Zeitungen und Zeitschriften, Druckereien, diverse Radio- und Fernsehkanäle und über 80 Web- und Mobile-Plattformen. Basierend auf seiner 180-jährigen Geschichte, steht Ringier für Pioniergeist und Individualität, für Unabhängigkeit sowie für Meinungsfreiheit und Informationsvielfalt. Exzellente Produkte, journalistische Qualität und erstklassige Unterhaltung sind Ringiers Markenzeichen. 1833 in der Schweiz gegründet, wird Ringier seit fünf Generationen als Familienunternehmen geführt.

Für die Intensivierung der Transformation von klassischen Medienprodukten in die digitale Welt suchen wir für den Bereich Publishing eine visionäre und führungsstarke Persönlichkeit als

### Chief Digital Officer 100 % (m/w)

#### Ihr Job

- Sie leiten das digitale Geschäft im Verlagswesen und entwickeln Synergien zu den Bereichen Entertainment und eCommerce von Ringier.
- Sie bauen die Schlüsselgebiete Mobile, Video, Creative Advertising und Social Media gezielt aus, entwickeln längerfristige Wachstumsstrategien und setzen diese erfolgreich um.
- Sie erhöhen die digitalen Umsätze und erschliessen neue Erlösquellen durch die Einführung neuer Produkte
- Sie hinterfragen Strukturen und Prozesse, mit dem Ziel, schneller auf Marktentwicklungen zu reagieren und neue Produkte rascher zu lancieren.
- Sie beobachten Marktentwicklungen, identifizieren Online Trends und verstehen es, diese für unsere Geschäftsmodelle zu adaptieren.
- Sie führen ein Expertenteam, welches Sie in den Schlüsselgebieten massgeblich unterstützt
- Sie schaffen ein innovationsförderndes Arbeitsklima und haben den Mut zu experimentieren
- Sie pflegen interne und externe Netzwerke
- Sie tragen die Verantwortung von Umsatz- und Investitionsbudgets

#### Ihr Profil

- Hochschul- oder Fachhochschulabschluss mit betriebswirtschaftlichem Schwerpunkt oder entsprechender Zusatzausbildung
- Erfolgsbilanz im Aufbau von digitalen Geschäften in der Medien-, Informationstechnologie- oder Telecom-Industrie und vertraut mit Internet-Businessmodellen
- Hervorragendes Verständnis für digitale Medien sowie für Verlagsthemen
- Ausgewiesener Digital Media Experte im Mediumfeld (exzellente Kenntnisse in Data Mining, Big Data Analytics, Algorithmic Development)
- Vertraut mit Transformationsprozessen von Unternehmen
- Charismatische Leaderfigur, welche Veränderungen im Unternehmen zum Erfolg führen kann
- Ausgeprägtes Verhandlungsgeschick mit der Fähigkeit, unterschiedliche Interessen zu koordinieren und Interessengemeinschaften zu bilden
- Belastbare, entscheidungsfreudige und teamorientierte Integrationsfigur mit gutem Durchsetzungsvermögen
- Englisch fließend

Wir bieten Ihnen Freiraum, um Ihr Wissen und Können tagtäglich einzusetzen. Ihr Arbeitsplatz befindet sich in Zürich.

Interessiert? Dann freuen wir uns auf Ihre Online-Bewerbung.

Für diese Position berücksichtigen wir ausschliesslich Direktbewerbungen.

[Online bewerben](#)

Ringier AG, Human Resources  
Lydia Zollinger, HR Manager  
+41 44 259 63 14, [www.ringier.ch](http://www.ringier.ch)

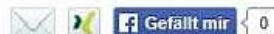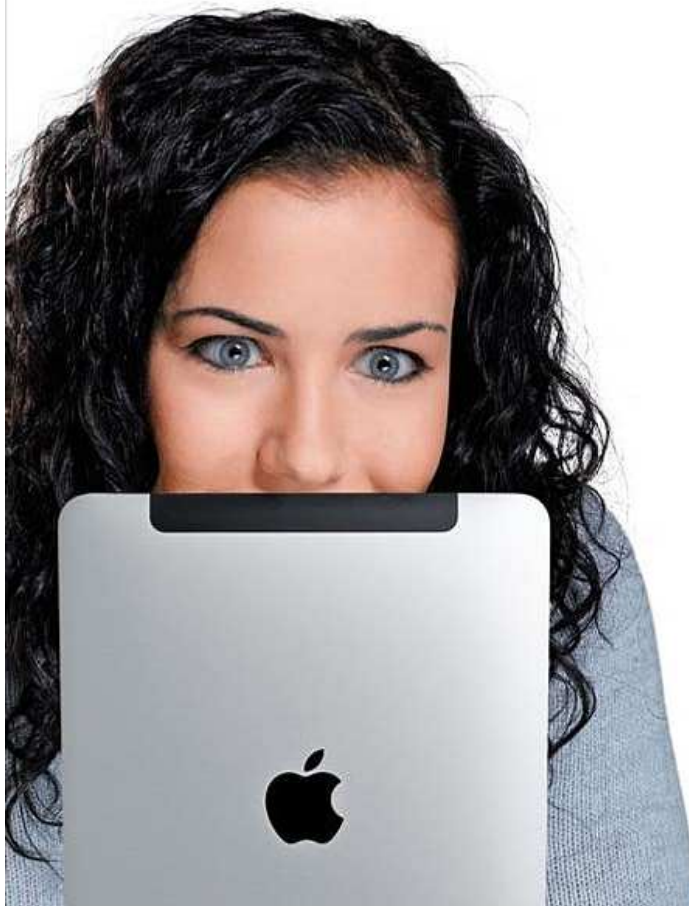

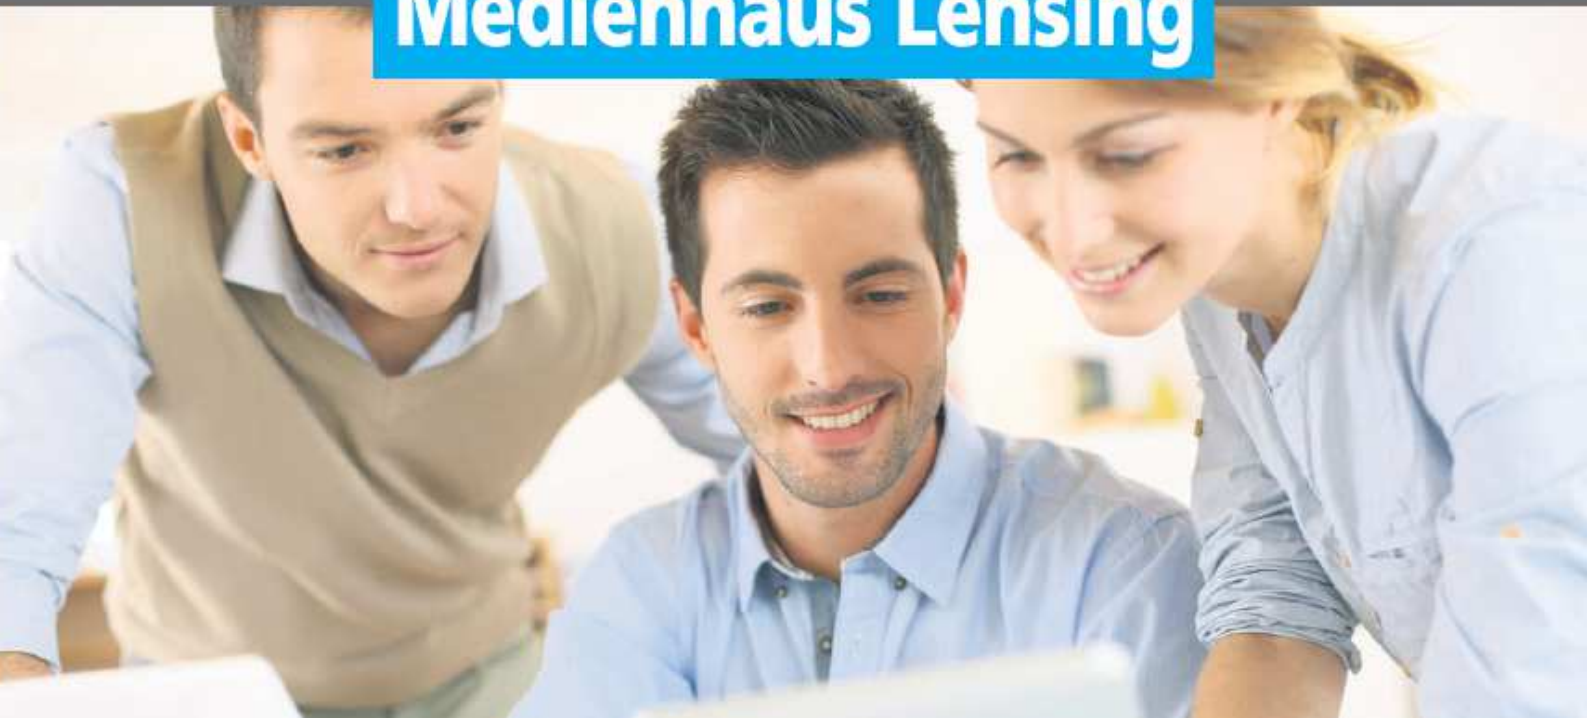

Für unsere **Geschäftsleitung** suchen wir ab sofort einen

## Chief Digital Officer (CDO) (m/w)

### Ihre Aufgaben:

- Sie führen die neuen Digital Divisions „Buzz09“ und „Ruhr24“ und entwickeln diese produkt- und vermarktungsorientiert fort
- Sie erkennen Markt- und Umsatzpotenziale und treiben die Konzeption und Neugründung weiterer digitaler Geschäftsfelder voran
- Sie scouten den Markt nach Investitionsmöglichkeiten in der digitalen Welt

### Ihr Profil:

- Sie verfügen über ein abgeschlossenes Studium und eine mindestens zweijährige Berufserfahrung in einem Startup der Digitalbranche
- Unternehmerisches, bereichsübergreifendes Denken
- Selbstständige, eigenverantwortliche Arbeitsweise
- Ausgeprägte Kommunikations- und Teamfähigkeit
- Loyalität und Vertrauenswürdigkeit

Wir bieten Ihnen die Mitarbeit in einem dynamischen Team.

Es erwartet Sie eine spannende und herausfordernde Tätigkeit mit gestalterischem Freiraum. Werden Sie integraler Bestandteil bei der Umsetzung eines für Gegenwart und Zukunft unseres Hauses strategisch bedeutenden Themas.

Wir freuen uns auf Ihre Bewerbung (bitte unter Angabe Ihres frühestmöglichen Eintrittstermins und Ihrer Gehaltsvorstellung) bis zum **11. Mai 2016**.

**Ruhr24 GmbH & Co. KG**  
**Geschäftsleitung / Nora Berk**  
**Westenhellweg 86-88, 44137 Dortmund**  
**[geschaeftsleitung@mdhl.de](mailto:geschaeftsleitung@mdhl.de), [www.Medienhaus-Lensing.de](http://www.Medienhaus-Lensing.de)**

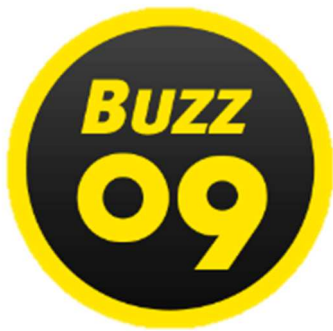

**24 Ruhr-24.de**

Das **Medienhaus Lensing** mit Sitz in Dortmund ist eines der größten Medienunternehmen in Nordrhein-Westfalen. Wir geben unter anderem die Tageszeitungen Ruhr Nachrichten, Dorstener Zeitung, Halterner Zeitung, und Münsterland Zeitung heraus. Neben den klassischen Digital-Angeboten wie Apps und eZeitung setzen wir auf digitale Expansion über die Grenzen der Tageszeitung hinaus.

**FRITZ & MACZIOL**

# WIR SUCHEN SIE!

Zur Verstärkung unseres Managementteams suchen wir in Ulm ab sofort eine(n)

## Chief Digital Officer (m/w)

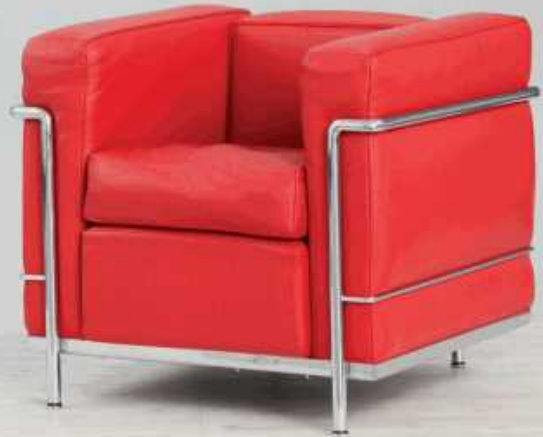

Für uns stehen die digitale Transformation und der Wandel zu einem themen- und leistungsorientierten Systemhaus im Fokus. Seit über 25 Jahren bieten wir unseren Kunden ein herstellerunabhängiges „Alles-aus-einer-Hand-Angebot“ von Software, Systemen und Dienstleistungen an. Als Bindeglied zwischen der Technik, unseren Kunden und den Anwendern im Unternehmen sind rund 1.000 Mitarbeiter/innen das wesentliche Fundament für die Erfolgsgeschichte der FRITZ & MACZIOL group. Finden auch Sie Ihren Platz bei uns!

Die IT Welt steht nicht still! Sie sind ebenso wie die FRITZ & MACZIOL group daran interessiert, sich stetig weiter zu entwickeln und mit der Zeit zu gehen? Wir suchen einen Chief Digital Officer (m/w) um unsere Prozesse genauso voranzutreiben und zu digitalisieren - dazu gehören folgende Aufgaben:

### IHRE AUFGABEN

- ✦ Begleitung der digitalen Transformation im Unternehmen, Erarbeitung der digitalen Strategie
- ✦ Treiber von Innovationen und Einsatz moderner IT-Lösungen zur Optimierung von Unternehmens- abläufen und -prozessen
- ✦ Unterstützung der Business Units in der Digitalisierung ihrer Geschäftsprozesse und ihres Online-Auftritts
- ✦ Digitalisierung von Prozessen
- ✦ Gestaltung neuer Abläufe zur Effizienzsteigerung und Begleitung der Fachbereiche bis zur erfolgreichen Umsetzung
- ✦ Projektleitungen und Beratung der Fachbereiche

Sie berichten direkt an die Geschäftsführung.

### DER MENSCH IM MITTELPUNKT

Bei uns finden Sie ein hoch motiviertes, überdurchschnittlich qualifiziertes Team mit Spaß an der Arbeit, beste Arbeitsbedingungen und einen eigenverantwortlichen Aufgabenbereich. Mit unserem Programm „Leben & Leisten“ bieten wir zahlreiche Benefits - von der Weiterbildung über flexible Arbeitszeitmodelle, Familienunterstützung, Altersvorsorge bis hin zu umfangreichen Sport- und Gesundheitsprogrammen.

### NEHMEN SIE PLATZ!

Lassen Sie uns Ihre vollständigen Bewerbungsunterlagen unter Angabe Ihrer Kündigungsfrist sowie Ihrer Gehaltsvorstellung über unser Karriereportal zukommen: [www.its-love.de](http://www.its-love.de)

Fragen zur dieser Stellenausschreibung werden gerne auch vorab am Telefon beantwortet.

### Ihre Ansprechpartnerin:

Martina Wendt, Telefon +49 731 1551 377 [mwendt@fum.de](mailto:mwendt@fum.de)

Wir freuen uns auf Ihre Bewerbung!

**FRITZ & MACZIOL**

Software und Computervertrieb GmbH

Hörvelsinger Weg 17-21

89081 Ulm

Telefon +49 731 1551-0

E-Mail [info@fum.de](mailto:info@fum.de)Web [www.fum.de](http://www.fum.de)

Wir gehören zur:

Software, Systeme und Dienstleistungen

**FRITZ & MACZIOL**  
group

**Deutschland** Berlin · Düsseldorf · Frankfurt · Hamburg · Hannover · Karlsruhe · Leipzig · Limburg · München · Münster · Nürnberg ·  
Reilingen · Stuttgart · Villingen-Schwenningen · **Schweiz** Rotkreuz · **Asien** Manila / Philippinen · Singapur · **Servicebüros: England**  
Gloucester · **Polen** Warschau · **Russland** Moskau · **Saudi Arabien** Riyadh · **Spanien** Murcia · **USA** Alpharetta

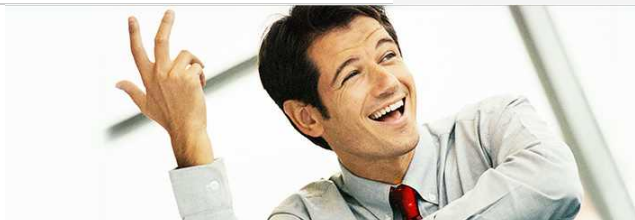

Inserat 09\_CDO\_Dienstleistung\_2StepAHead

22.08.2015

Via UN-Website

## Chief Digital Officer (m/w)

Unser Klient ist seit über 25 Jahren Europas Nr. 1 für Last Minute Reisen. Bereits 1987 hat unser Klient in Deutschland die Last Minute-Reise erfunden und ist heute mit rund einer Million Gästen jährlich europäischer Marktführer für Spontanurlaub. Täglich gibt es über zehn Millionen Angebote. Neben Badeurlaub sind auch City-Trips, Sport- und Wellness-Reisen, Kreuzfahrten, Event-Reisen und Winterurlaub buchbar. Im Rahmen der Erweiterung der geschäftlichen Aktivitäten wurde die Rolle des Chief Digital Officers neu geschaffen. Sie berichtet direkt an den Vorstand. Das Hauptaugenmerk liegt in der Entwicklung der digitalen Strategie unseres Klienten und natürlich deren Umsetzung. Im Rahmen dieser Aufgabe führt der zukünftige Stelleninhaber ca. 30 Mitarbeiter.

### Aufgaben

- Erarbeitung der digitalen Strategie
- Begleitung der digitalen Transformation
- Steuerung und Weiterentwicklung aller webbasierten Aktivitäten
- Sicherstellung von ertragreichem Wachstum in allen online-basierten Vertriebskanälen
- Monitoring und Optimierung von Traffic und Conversion
- Steuerung der direkten Endkundenkommunikation über CRM und Kundenbindungsmaßnahmen
- Ausrichtung der Marketingaktivitäten auf digitale Kommunikation und Weiterentwicklung der Marke

### Anforderungen

- Mehrjährige Berufserfahrung im online/digitalen Umfeld
- Management- oder Saleserfahrung im digital/online-Umfeld (B-t-C)
- Erfahrung in der Führung größerer Teams
- Breites Prozess-Know-how, fundierte Projektmanagement- und Changemanagementenerfahrung
- Überzeugungskraft und Durchsetzungsvermögen
- Präsentations- und Moderationsfähigkeit
- Teamplayer

### Sonstiges

- Wirtschaftswissenschaftlicher Hochschulabschluss
- Standort Süddeutschland
- Sehr gute Englischkenntnisse

[Bewerben](#)

[Teilen](#)

[Zurück](#)

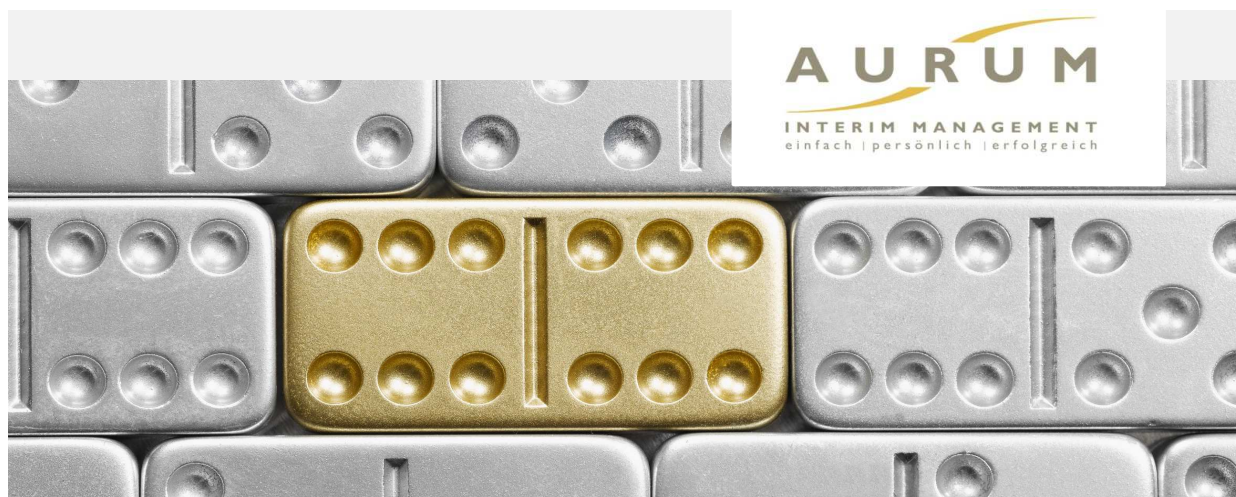

Für einen unserer Kunden suchen wir kurzfristig einen persönlich und fachlich hoch qualifizierten

Interim  
Mandat

## Chief Digital Officer (m/w)

Unser Auftraggeber ist ein stark wachsendes Dienstleistungsunternehmen.

**Interim Mandat / Baden-Württemberg**

### Das Aufgabengebiet:

- Weiterentwicklung und Implementierung der übergreifenden Digitalstrategie inkl. Initiierung entsprechender strategischer Maßnahmen und digitaler Innovationen sowie Optimierung relevanter Strukturen und Prozesse
- Verantwortung für den Betrieb und die Weiterentwicklung aller digitalen Kanäle inkl. des E-Commerce
- Führung des Online-Teams und operative Steuerung aller digitalen Aktivitäten
- Abstimmung mit den Fachbereichen zum zielgerichteten Einsatz der digitalen Kanäle
- Sicherstellung einer überzeugenden Customer Journey sowie des homogenen, markenstärkenden Auftritts über alle digitalen Kanäle hinweg
- Steuerung interner und externer Dienstleister

### Sie bieten uns:

- Ein erfolgreich abgeschlossenes betriebswirtschaftliches Studium oder eine vergleichbare Qualifikation
- Einschlägige Berufs- und Führungserfahrung und ein ausgeprägtes Verständnis für digitale Transformationsprozesse, Kundengewinnung und -bindung sowie Monetarisierung
- Hervorragende kommunikative Fähigkeiten und gleichermaßen ausgeprägte strategisch-konzeptionelle wie auch operativ-umsetzende Stärke
- Profunde Projekt-/Programm-Managererfahrungen
- Fließendes Englisch

### Wir bieten Ihnen:

- Attraktive Tagessätze und Nebenkonditionen
- Partnerschaftliche Vertragsgestaltung
- Laufende Unterstützung durch das Aurum-Shadow-Management
- Einbindung in das Aurum Expertennetzwerk
- State-of-the-Art Know-how Vermittlung in der Aurum Academy
- Offene und transparente Kommunikation zum Kunden
- Methodendatenbank und Aurum Professional Assistance

Interesse? Bitte bewerben Sie sich online. [Hier](#) haben Sie die Möglichkeit, uns Ihre aussagekräftigen Bewerbungsunterlagen zu übermitteln. Für Fragen zu diesem Mandat stehen wir telefonisch unter +49 211 159 70 60 oder per Email unter Angabe der Referenznummer (MAN-01795) an [bewerbung@aurum-interim.de](mailto:bewerbung@aurum-interim.de) gerne zur Verfügung.



## Chief Digital Officer (m/w)

### Firmenprofil

Unser Mandant ist ein äußerst erfolgreiches, international agierendes, familiengeführtes Unternehmen mit mehreren Tausend Mitarbeitern. Es erzielt einen Umsatz im hohen dreistelligen Millionenbereich. Das Unternehmen unterhält mehrere internationale Produktionsstätten und verfügt über ein weltweites Vertriebsnetz. In seinem Marktsegment ist unser Mandant Weltmarktführer. Das mehrfach ausgezeichnete Unternehmen mit Sitz in Ostwestfalen sucht einen führungserfahrenen, innovativen und unternehmerisch denkenden Chief Digital Officer (m/w), der direkt an den Vorstandsvorsitzenden berichtet und einen neuen Zentralbereich begründen wird.

### Aufgabengebiet

- Steuerung des weltweiten digitalen Wandels des Unternehmens und des Wertschöpfungsnetzwerks auf der Basis einer Digitalen Strategie, die sich aus der Unternehmensstrategie ableitet
- Entwicklung, Steuerung und Durchsetzung bereichsübergreifender Projekte zur internationalen synchronen Digitalisierung des Unternehmens
- Verknüpfung aller digitalen Aspekte zur Unterstützung der Unternehmensstrategie bei maximaler Ausnutzung von Synergien
- Bewertung und Auswahl neuer Hard- und Software zur Sicherung der Geschäftsabläufe und zur Sicherung vor externen Angriffen in Abstimmung mit dem IT-Department
- Entwicklung einer engen und produktiven Kommunikation zwischen allen Gesellschaften, Funktionsbereichen und dem Management
- Leitung und Unterstützung des Change Managements sowie Entwicklung von Weiterbildungskonzepten für die Mitarbeitenden des Unternehmens in Abstimmung mit dem HR-Bereich
- Überprüfung des digitalen Fortschritts durch geeignete quantitative Kriterien
- Erarbeitung von Vorschlägen zur Neuausrichtung von Geschäftsmodellen auf der Basis neuer digitaler Produkte und Services bzw. auf Basis von Markt- und Kundenanforderungen
- Erkennung von potenziell disruptiven Geschäftsmodellen und Erarbeitung von Konzepten für die verschiedenen Märkte des Unternehmens
- Gestaltung und Implementierung neuer digitaler Prozesse für die Kunden- und Lieferantenbeziehungen und Schaffung neuer Serviceangebote
- Gestaltung und Schaffung einer effizienten Organisation mit neuen Prozessen für die Digitalisierung des Unternehmens
- Enge Abstimmung mit anderen Fachbereichen und Geschäftseinheiten
- Steuerung der dem Bereich zugeordneten Personen (im Aufbau)

### Anforderungsprofil

- Erfolgreich abgeschlossenes Studium (Uni/FH) und idealerweise mindestens fünf Jahre Erfahrung in einer Führungsposition mit disziplinarischer Verantwortung
- Berufserfahrung in und Leidenschaft für produzierende, international orientierte mittelständische Industrieunternehmen sowie fundierte Erfahrung im Themenkomplex Industrie 4.0 / IoT
- Erfahrungen in der Entwicklung und Umsetzung von Digitalisierungsstrategien
- Erfahrungen mit SAP, Hybris und dem Informationsmanagement
- Erfahrungen in der intelligenten Nutzung der Bereiche Social Media, e-Business / e-Commerce, Marketing, Mobile Applications, Big Data und digitalen Technologien
- Erfahrungen in der strategischen (Neu-)Ausrichtung unternehmensweiter Software Architekturen
- Erfahrungen im IT-Projektmanagement sowie fundierte Kenntnisse in der Umsetzung von Change Management Prozessen
- Fähigkeit der Entwicklung von neuen Geschäftsmodellen unter Berücksichtigung bestehender und neuer Wertschöpfungsketten
- Fähigkeit, bestehende Wissenssilos aufzubrechen, Kooperationsbereitschaft zu fördern und dadurch zu konsensfähigen Lösungen zu kommen
- Strukturierte, organisierte und ergebnisorientierte Arbeitsweise und „hands-on“- Mentalität, um Projekte erfolgreich umzusetzen
- Ausgeprägte Innovationsfreude und die Fähigkeit, „out of the box“ zu denken

### Bewerben

### Job-Details

**Datum:** 23/02/2016  
**Referenz-Nr.:** 246048/001  
**Ort:** North Rhine-Westphalia  
**Anstellungsart:** Feste Anstellung

### Über Michael Page

In vielen Recruiting-Schlüsselmärkten hat sich Michael Page eine führende Position erarbeitet, dabei hat sich die Gruppe gerade auch auf Märkten positioniert, die ein großes Wachstumspotenzial beinhalten.

### Mehr Informationen

### Auszeichnungen

PageGroup Deutschland als Arbeitgeber

### Folgen Sie uns auf:

- Ausgeprägte analytische und konzeptionelle Fähigkeiten bei gleichzeitig menschenorientierter Führungskultur
- Umsetzungs- und kommunikationsstarke Führungspersönlichkeit mit breitem Technologieverständnis
- Hohe Eigeninitiative, Verantwortungsbewusstsein, Durchsetzungsfähigkeit und Teamfähigkeit
- Verhandlungssichere Deutsch- und Englischkenntnisse

#### Vergütungspaket

- Eine herausfordernde Aufgabe in einem dynamischen, marktführenden und zukunftsorientierten Unternehmen
- Entscheidungs- und Gestaltungsfreiraum
- Attraktives Vergütungspaket + Dienstwagen

#### Bewerben

Wir freuen uns auf Ihre aussagekräftige Bewerbung unter Angabe Ihrer Gehaltsvorstellung und der Referenznummer 246048/001

Ihre Bewerbung wird an **Michael Wulf** weitergeleitet.

**Bitte beachten Sie:** Um eine schnelle Bearbeitung Ihrer Bewerbung sicherzustellen, bitten wir ausschließlich um Online-Bewerbungen.

## Chief Digital Officer - Industrie 4.0 (m/w)

Anzeige Nr.: VS-60311

**Arbeitgeber:**

**International tätiges Unternehmen der Konsumgüterindustrie mit mehreren 1000 Mitarbeitern**

**Stellenbeschreibung:**

Gesucht wird ein motivierender, empathischer Manager, der sich mit dem gesamten Spektrum des digitalen Wandels in einem produzierenden Industrieunternehmen der „Old Economy“ auskennt, u.a. sowohl im Produktions-, Finanz-, Vertriebs- und Logistikbereich. Sie treiben alle digitalen Themen voran und ziehen dabei auch die restlichen Mitarbeiter mit.

Diese neu geschaffene Position wird eng mit der Geschäftsführung zusammenarbeiten. Die Definition und Priorisierung der anzugehenden Themen würden wir gerne mit Ihnen zusammen erarbeiten.

Klingt das spannend und herausfordernd für Sie? Dann sollten wir uns persönlich kennenlernen!

Bitte nehmen Sie Kontakt mit dem von uns beauftragten Berater Dr. Volker Skibbe auf.

**Geforderte Kenntnisse/Erfahrungen:**

**Dienstort/Einsatzort:** Süddeutschland

**Einkommen:** Je nach Erfahrung und Qualifikation

**Eintrittsdatum:** Baldmöglichst

**Sonstiges:**

**Kontaktperson:**

Dr. Volker Skibbe  
Vierkatzen 17b  
21629 Neu Wulmstorf  
Tel.: +49 (0)40 64793593  
Mob.: +49 (0)176 62013631  
e-mail: [skibbe@mbm.de](mailto:skibbe@mbm.de)

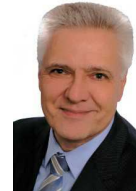

Kurzbewerbung

Infoletter:  
Neue Stellenangebote anfordern

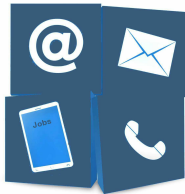

### Unser Infoletter

**Individuelle Stellenangebote per Email**

Ein einfaches Auswahlmenü ermöglicht Ihnen, sich von uns zielgerichtet die neusten [Stellenangebote senden zu lassen](#).

In dieser Mail werden Sie Links zu den von Ihnen angeforderten Stellenangeboten finden.

So einfach wie Sie den Infoletter anfordern, können Sie ihn auch wieder abbestellen (mit einem Klick). Natürlich sind Ihre Daten bei uns sicher und absolut vertraulich.

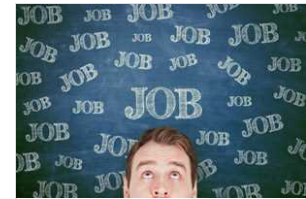

### Stellenangebote

**Eine aktuelle Auswahl:**

[Chief Digital Officer - Industrie 4.0 \(m/w\), Süddeutschland](#)

[Export Compliance Manager / Zollrechtsexperte \(m/w\), Süddeutschland](#)

[Kosmetikentwickler Naturkosmetik \(m/w\), Südliches Bayern](#)

[Regional Sales Director EMEA - Paints / Coatings / Composites \(m/f\), Northern Germany](#)

[Kosmetikentwickler Mundpflegeprodukte \(m/w\), Süddeutschland](#)

[Kosmetikentwickler Sonnenschutz \(m/w\), Süddeutschland](#)

[IT-Service Delivery Manager \(Infrastruktur Outsourcing/Transition\), München, Nürnberg](#)

Ihre Wunsch Position ist nicht dabei? Finden Sie hier weitere [Stellenangebote](#).

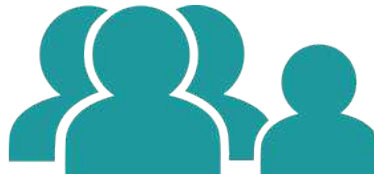

Die Okanda AG betreibt das Meeting- und Tagungsraumportal [www.okanda.com](http://www.okanda.com). Der Firmensitz der AG ist in Wiesbaden. Dort ist auch Dein Einsatzort.

Zum nächstmöglichen Termin suchen wir zur Verstärkung unseres Management Boards einen/eine

## Chief Digital Officer (m/w)

### Du hast die komplette Verantwortung über

- Planung, Strategie und Ausführung sämtlicher Marketing Initiativen, Schwerpunkt digitales Marketing
- Performance basierte Kampagnen, Keyword-Entwicklungen, Landing-Page Entwicklungen und a / b-Tests
- Entwicklung von On- und Off-Page SEO-Strategien, setzt diese mit der IT und Deinem Team in die Tat um
- Du entwickelst Social Media Strategien, Blogs uvm. zur Markenbildung und Performance Steigerung
- Produktmanagement unserer digitalen Produkte und Content-Managements unserer Webseite
- Ausbau und die Weiterentwicklung unserer Affiliate und White Label Produkte
- Displaywerbung und Real Time Advertising, Google AdWords und Retargeting Kampagnen
- Online Customer Care
- Budget,- und Personalverantwortung
- Monatliches Reporting der Marketing KPIs an den Aufsichtsrat

### Darüber hinaus hast Du als Mitglied des Vorstandes folgende Aufgaben

- Vorbereitung und Teilnahme an Aufsichtsratssitzungen
- Teilnahme an Investoren-Meetings
- Budget-Planung des Unternehmens
- Innovations-scouting im Bereich des digitalen Marketings
- Repräsentant der Okanda AG auf Veranstaltungen

### Dein Profil

- Abgeschlossene Ausbildung oder Studium in fachlich relevanten Gebieten
- Startup-Erfahrung und Berufserfahrung im digitalen Marketing und Produktmanagement
- Du verfügst über gute Kenntnisse im Umgang mit gängigen Online-Marketing und Analyse Tools
- Strukturiert und detailorientiert Arbeitsweise, analytische Denkweise, souveräne Kommunikation und Teamfähigkeit
- Hoher Grad an Belastbarkeit sowie Analyse- und Problemlösungskompetenz
- Sehr gute Deutschkenntnisse und Englischkenntnisse in Wort und Schrift

### Was wir bieten

- Eine Position, in der Du ab dem ersten Tag zum Wachstum und der Bekanntheit des Unternehmens beiträgst und Verantwortung übernimmst
- Dynamisches, engagiertes und zielorientiertes Team, das ein noch junges Unternehmen mit Leidenschaft voran treibt
- Erfahrenes Gründerteam und exzellentes Supporter-Netzwerk
- Flexible und familiäre Arbeitsatmosphäre
- Marktgerechte Vergütung und Option auf Unternehmensanteile gleich nach der Probezeit

Haben wir Dein Interesse geweckt? Dann schick uns Deine Bewerbung unter Angabe des nächstmöglichen Eintrittstermins an:

[careers@okanda.com](mailto:careers@okanda.com)

### Okanda Unternehmens-Kultur

Unsere Mitarbeiter machen Okanda zu dem, was es ist. Wir holen clevere und zielstrebige Menschen in unser Team. Dabei sind uns Fähigkeiten wichtiger als Erfahrung. Alle Mitarbeiter teilen gemeinsame Ziele und wir verfolgen eine Vision für Okanda!

### Firmenadresse:

#### Okanda AG

Dirk Führer (Vorstand)  
Parkstraße 16  
65189 Wiesbaden

Telefon: +49 611 97819 555  
E-Mail: [service@okanda.com](mailto:service@okanda.com)  
[www.okanda.com](http://www.okanda.com)

ÜBER OKANDA

JOBS

FAQ

REPRÄSENTANZEN

PRESSEMITTEILUNGEN

BLOG

KONTAKT

DATENSCHUTZ

IMPRESSUM

### KONTAKT

Okanda AG  
Parkstraße 16  
65189 Wiesbaden

### BENÖTIGEN SIE HILFE?

Sie erreichen das Okanda Service-Team telefonisch unter +49 611 97819 555 oder mit einer E-Mail an [service@okanda.com](mailto:service@okanda.com).

### BESUCHEN SIE UNS

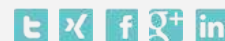

### UNSERE PARTNER

**GCB**

Meetings made in Germany  
German Convention Bureau

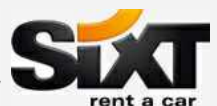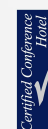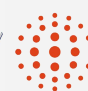

TRAVEL INDUSTRY CLUB

## Chief Digital Officer (m/f)

**Job Nr. 2692**

Unser Mandant ist ein hervorragend etabliertes und international erfolgreich agierendes Handelsunternehmen und in seinem Segment führend in Central Europe. Mit einem dreistelligen Millionenumsatz und mehreren hundert Mitarbeitern bietet das Unternehmen seinen Kunden individuelle Lösungen für deren jeweilige Herausforderungen im Tagesgeschäft und schafft so einen nahezu einzigartigen Mehrwert in seinem Branchensegment.

**Branche:** Handel, Konsumgüterindustrie  
**Aufgabenfeld:** Management, Beratung  
**Region:** München

### Die Aufgabe

Wir suchen einen innovativen und unternehmerisch denkenden **Chief Digital Officer (m/w)**, der als Mitglied der Geschäftsleitung in dieser Rolle das weitere effiziente Wachstum unseres Mandanten entscheidend mit gestalten und prägen wird.

In dieser neugeschaffenen Position verantworten Sie die komplette digitale Roadmap, Sie übertragen traditionelle "analoge" Geschäftsmodelle in webbasierte Anwendungen, integrieren diese in die Wachstumsstrategie des Unternehmens und bauen die digitale Präsenz und die positive Wahrnehmung unseres Mandanten im Markt weiter auf und aus.

Die Um- und Durchsetzung der digitalen Transformation in sämtlichen Business-Bereichen, gehört hier ebenso zu Ihrem Aufgabengebiet, wie die (Weiter-)Entwicklung der Online-Strategie. Sie verantworten den gesamten Prozess von der Analyse des Ist-Zustandes, über die Formulierung von Handlungsalternativen bis zur erfolgreichen Umsetzung der digitalen Agenda.

Sie entwickeln und steuern bereichsübergreifende Projekte zur internationalen synchronen Digitalisierung, dabei verknüpfen Sie alle digitalen Aspekte unter maximaler Nutzung von Synergieeffekten zur Weiterentwicklung der Unternehmensstrategie. Den digitalen Fortschritt überprüfen Sie laufend anhand geeigneter KPI's.

Auf der Basis neuer digitaler Produkte und Services bzw. auf Basis von Markt- und Kundenanforderungen erarbeiten Sie Vorschläge zur Neuausrichtung von Geschäftsmodellen und gestalten durch die Implementierung neuer digitaler Prozesse für die Kunden- und Lieferantenbeziehungen neue Serviceangebote für eine „State-of-the-Art Customer Journey“.

Als „positiver Störenfried“ stellen Sie die bestehenden Prozesse/ Systeme/Tools in Frage, nehmen aber gleichzeitig - als Treiber wie auch als Mediator - die Mitarbeiter aller Abteilungen auf die digitale Reise mit.

### Anforderungsprofil

Für diese Position suchen wir einen passionierten und überzeugten Digitalisierungsprofi, der sich gleichermaßen als Strategie, Umsetzer, Change Manager und Impulsgeber versteht. Dank Ihres unternehmerischen Talentes können Sie das gesamte Unternehmen so geschickt verzahnen, dass die Customer Journey on- wie off-line ein überzeugendes Kauf- und Serviceerlebnis bietet. Sie entwerfen mutige Zukunftsvision und können gleichzeitig einen umfassenden Transformationsprozess gestalten und durchsetzen.

Sie haben ein einschlägiges Studium (BWL, IT, Wirtschaftsinformatik) erfolgreich abgeschlossen und bereits langjährige Führungserfahrung in der Entwicklung und Umsetzung von belastbaren Digitalisierungsstrategien und neuen Geschäftsmodellen unter Berücksichtigung bestehender und neuer Wertschöpfungsketten. Beginnend mit der Statusanalyse, über das Entwickeln und Umsetzen von Workshops, haben Sie bereits die Optimierung verschiedener digitaler Geschäftsmodelle selbst verantwortet. Ebenso verfügen Sie über umfassende Erfahrung im E-Commerce sowie in den mobilen Umfeldern.

Mit Ihrer strukturierten, analytischen und ergebnisorientierten Arbeitsweise und „hands-on“- Mentalität stellen Sie stets erfolgreiche Projektumsetzungen sicher. Sie besitzen eine hohe Affinität und Verständnis für KPI's und deren Analyse und sind es gewöhnt, Ihre Erfolge durch fundiertes Datenmaterial zu belegen.

Ihre ausgeprägte Innovationsfreude und die Fähigkeit, „out of the box“ zu denken, sowie bestehende Wissens-Silos aufzubrechen, ermöglichen es Ihnen, die Kooperationsbereitschaft aller beteiligten Unternehmensbereiche zu fördern und dadurch zu konsensfähigen, vernetzten Lösungen zu kommen. Neben einem tiefen Verständnis von Nutzerbedürfnissen bringen Sie einen guten Überblick über aktuelle digitale Trends mit. Die Kombination aus herausragenden organisatorischen und konzeptionellen Fähigkeiten bei gleichzeitig menschenorientierter Führungskultur macht Sie zu einer umsetzungs- und kommunikationsstarken Führungspersönlichkeit. Neben fachlichen Qualifikationen bringen Sie vor allem Überzeugungskraft, Risikobereitschaft und Neugier mit. Ihr Führungsstil zeichnet sich durch Offenheit, Transparenz, Agilität und hohe Kooperationsbereitschaft aus und wird durch einen durchgängig

■ About human council

respektvollen Umgang mit Kollegen – unabhängig von Hierarchie und Rolle –  
komplettiert.

Aufgrund der internationalen Ausrichtung der Position sind verhandlungssichere  
Deutsch- und Englischkenntnisse zwingend erforderlich.

#### **Sonstiges**

Wenn Sie ein Umfeld mit einer inspirierenden und außergewöhnlich  
ambitionierten Arbeitsatmosphäre suchen, das Ihre Stärken zu schätzen weiß  
und Ihre persönliche Entwicklung im Unternehmen aktiv unterstützt, dann  
sollten sie sich unbedingt bewerben!

Wenn Sie sich in den dargestellten Anforderungen wiederfinden, freuen wir uns  
auf Ihren aussagekräftigen, tabellarischen Lebenslauf per Email oder nutzen Sie  
unser komfortables Bewerbungsformular, das Sie über den Button „Hier  
bewerben“ erreichen. Wir freuen uns auf Ihre Unterlagen und sichern Ihnen  
absolute Diskretion zu.

#### **Ihr Ansprechpartner**

Martina Kokta-Sterr  
e-mail: [koktasterr@humancouncil.de](mailto:koktasterr@humancouncil.de)  
Telefon: +49 (0) 89 - 21 666 80-0

[hier bewerben](#)

PEOPLE MAKE THE DIFFERENCE

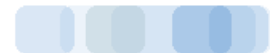

**DIE POST SUCHT...**

Job Detail #1

**CHIEF DIGITAL OFFICER (M/F)  
E-COMMERCE**Region: **Wien**, Anstellungsart: **unbefristet**, Berufsfeld: **Informationstechnologie**

Die Österreichische Post AG sucht für ihre Tochtergesellschaft, ein Start-up-Unternehmen im Bereich E-Commerce, eine IT-Führungspersönlichkeit mit hoher Online-Affinität und unternehmerischer Denkweise zum Aufbau einer innovativen und performanten Verkaufsplattform.

 Ihre Aufgaben

- Definition & Umsetzung der IT-Strategie, von der Entwicklung der Zielarchitektur über die Etablierung effektiver Entwicklungsmethoden für Aufbau und Customizing der Plattform, Betrieb und Releasemanagement bis hin zur Optimierung bestehender IT Entwicklungs- und Kollaborations-Prozessen zur Erhöhung der Produktivität, Agilität und Ergebnisqualität des IT-Teams
- Aufbau und Führung der IT-Abteilung mit einem Skill- und Erfahrungsmix aus agilen Entwicklungsmethoden, Software Life Cycle Management und DevOps Methoden
- Konzeptionierung und Umsetzung neuer Ideen bzw. technischer Neuheiten und innovativer Lösungen auf Basis identifizierter Trends, Markt-, Produkt- und Technologieentwicklungen sowie Koordination der Prototypenentwicklung
- Verantwortung für Entwicklung sowie Betrieb in Bezug auf Mitarbeiter und technische Ressourcen sowie die Steuerung der Partner im In- und Ausland.

 Anforderungen

- Einschlägig technischer Universitätsabschluss oder gleicher Wissensstand durch langjährige Berufspraxis
- Projektmanagementenerfahrung in E-Commerce Entwicklungsprojekten, von der Konzeption über Umsetzung bis zum Betrieb der Anwendung
- Erfahrung in Entwicklungs- bzw. Betriebsmethodiken im Gebiet von Online Marketing, Customer Journey, User Experience von Vorteil
- Erfahrung mit mobilen und Web-Oberflächen (Responsive Design)
- Herausragende IT-Kenntnisse, idealerweise auf hybriden oder vergleichbaren E-Commerce Systemen
- Mehrjährige Erfahrung mit modernen Entwicklungsmethoden wie Extreme Programming, SCRUM oder Kanban, modernen Testmethoden wie Testdriven Development und DevOps Methoden wie Continuous Delivery
- Ausgezeichnete Englischkenntnisse

Wenn Sie als Visionär/in und Gestalter/in herausfordernde Aufgaben in einem dynamischen Umfeld schätzen, freuen wir uns auf Ihre aussagekräftigen Bewerbungsunterlagen.

Ihr Gehalt ist abhängig von Ihrer Erfahrung und Qualifikation, jedoch mindestens EUR 65.000,- Bruttojahresgehalt, all-in, inklusive Prämie.

**Bewerben (<https://karriere.post.at/bewerben/job/1492>)**

**Mentis**  
CONSULTING

Menschen zum Erfolg

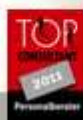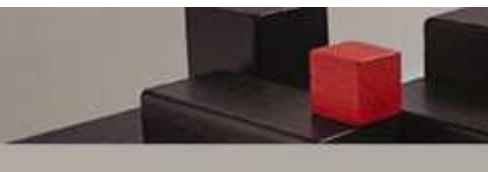

## Chief Digital Officer (m/w)

**Kreativer Change Manager  
zur Steuerung des  
digitalen  
Transformationsprozesses  
bei Top-Unternehmen  
gesucht!!**

### BESCHREIBUNG DES UNTERNEHMENS

Unser Auftraggeber ist ein renommierter, familiengeführter Marken-Systemanbieter mit Sitz in Nordbayern. Als Key Player mit über 2.000 Mitarbeitern hat man sich eine herausragende Marktpositionierung sowohl im nationalen als auch internationalen Kontext erarbeitet. Basis dafür sind eine ausgeprägte Innovationsstärke, eine konsequent markt- und qualitätsorientierte Produktentwicklung, hochmoderne Produktionsstrukturen sowie ein zielgruppengerechtes Produktmanagement.

### WESENTLICHE AUFGABEN

Um den digitalen Wandel weiter im Unternehmen zu verankern, soll die gesamte digitale Verantwortung in einer neugeschaffenen Topposition gebündelt werden. Hierfür wird ein unternehmerisch denkender Chief Digital Officer (m/w) mit direkter Berichtslinie an den CEO der Unternehmensgruppe gesucht. Dadurch sollen insbesondere die gruppenweite digitale Transformation sichergestellt werden sowie neue digitale Geschäftsmodelle entstehen.

Ihre Aufgaben im Einzelnen:

- Erarbeitung digitaler Geschäftsmodelle für bestehende Teilbereiche oder komplett neue Themengebiete; Entwicklung von neuen digitalen Produkten und Services, Erschließung von Potentialen von erfassten Daten
- Definition der Digitalstrategie für Marketing, Kommunikation und Sales; Schaffung eines kundennutzenorientierten, klaren Bildes über die Ansprache und Interaktion der jeweiligen Zielgruppen, über definierte Kanäle, Prozesse und Maßnahmen
- Beobachtung aller relevanten Trends im Unternehmensumfeld und Ableitung möglicher Geschäftsmodell-Potentiale für die Gruppe
- Koordination aller digitalen Maßnahmen innerhalb der Gruppe und Schaffung von möglichen Synergien innerhalb der Teilbereiche; regelmäßiger Austausch mit dem CIO und den Digitalverantwortlichen der Teilbereiche
- Treibende Kraft bei der effizienten Gestaltung interner Prozesse und Systeme innerhalb der Wertschöpfungskette durch Digitalisierung zur Nutzung der Potentiale der Industrie 4.0 und Schaffung der dafür notwendigen strukturellen und technologischen Voraussetzungen
- Feststellung des zum digitalen Wandel nötigen Know-hows und der Kompetenzen der Mitarbeiter; Etablierung neuer Arbeitsmethoden und Tools zur Verbesserung der Zusammenarbeit im Unternehmen und mit externen Partnern
- Treibende Kraft der für den digitalen Wandel benötigten Technologien in enger Abstimmung mit dem CIO

### IHRE ANSPRECHPARTNER

Alfred Dambacher und Petra Sager

Tel.: 06198 - 575661

E-Mail:

[IHR@mentis-consulting.de](mailto:IHR@mentis-consulting.de)

### KENNZIFFER (UND POSTANSCHRIFT)

**I-160103J**

Mentis International Human Resources GmbH  
Arminiusstraße 3  
90402 Nürnberg

Internet:

[www.mentis-consulting.de](http://www.mentis-consulting.de)

### QUALIFIKATIONSPROFIL

- einschlägiges Hochschulstudium
- mehrjährige Erfahrung als Führungskraft in der digitalen Welt



- umfassende Kenntnisse digitaler Technologien (bspw. IoT, Mass-Customization, Big Data etc.) und deren Potentiale für Produktion, Produkte und Services; nachweisliche Erfolge in der Entwicklung digitaler Geschäftsmodelle und deren Weiterentwicklung; Erfahrung im Vertrieb digitaler Produkte und Services; Kompetenzen im Bereich Mobile, Cross-Channel incl. E-Commerce und Digital Sales; fundierte betriebswirtschaftliche Kenntnisse, ausgeprägtes technisches Verständnis; tiefgehende digitale Kompetenz; Erfahrung in umfassenden Transformationsprozessen; umfassendes Datenverständnis, Verständnis von End-to-End Prozessen
- Führungserfahrung erforderlich
- verhandlungssicheres Englisch
- kommunikationsstarke und überzeugende Persönlichkeit
- gedankliche Flexibilität, Offenheit
- Spirit, Begeisterungsfähigkeit, Leidenschaft
- Mut, Zielorientierung, Urteils- und Entscheidungsfähigkeit, Durchsetzungsvermögen
- Forschergeist
- wertorientierter Führungsstil
- Change Manager, Veränderungsinitiative
- Innovationskraft, initiativ, kreativ
- unternehmerisches Handeln, Verständnis für Geschäftsstrategien und finanzielle Konzepte
- Internationalität

Bitte senden Sie Ihre komplette Bewerbung – am besten per E-Mail – unter Angabe der Kennziffer an die nebenstehenden Kontaktdaten.

Wir freuen uns auf Ihre Unterlagen!

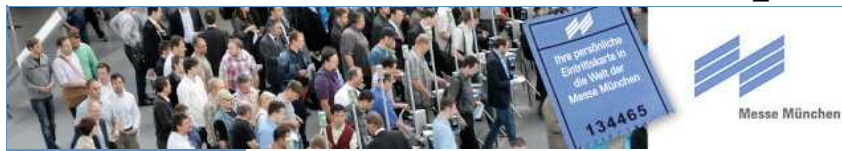

Die **Messe München** ist eine der weltweit führenden Messegesellschaften mit rd. 800 Mitarbeiterinnen und Mitarbeitern im In- und Ausland und einem globalen Auslandsvertriebsnetz.

In der **Messe München**, im MOC Veranstaltungszentrum München und im ICM - Internationales Congress Center München veranstalten wir mehr als 40 eigene Messen und unterstützen die Organisation einer Vielzahl von Gastveranstaltungen und Kongressen. Darüber hinaus veranstaltet die Messe München Fachmessen in China, Indien, der Türkei und in Südafrika.

Mit über **600.000 qm** Ausstellungsfläche und einem hochmodernen Messegelände gehört die Messe München zu den sieben größten Messegesellschaften Deutschlands.

Als **global tätiges Unternehmen** leistet die Messe München bei Umweltschutz und Nachhaltigkeit einen wesentlichen Beitrag.

Sie sind bereit, in einem herausfordernden und dynamischen Umfeld an der Weiterentwicklung und Umsetzung unserer Digitalstrategie zu arbeiten? Sie möchten mit eigener Ergebnisverantwortung die digitalen Angebote und damit den digitalen Transformationsprozess der Messe München federführend vorantreiben? Sie möchten auch international ein neues Geschäftsfeld aufbauen und besitzen das Selbstvertrauen, Ihre Ideen verwirklichen zu können?

Dann heißen wir Sie herzlich Willkommen als

**Leiter (m/w) Geschäftsbereich Digital / Chief Digital Officer (CDO)**

**Arbeitszeit:** Vollzeit

**Ihre Aufgaben:**

- Gemeinsam mit ihren direkt unterstellten Führungskräften und deren wachsenden Teams gestalten sie digitale Produkte und Services.
- Sie entwickeln neue Geschäftsmodelle und Monetarisierungsstrategien zum Auf- und Ausbau digitaler Umsätze.
- Sie begeistern sich für digitale Trends, identifizieren diese und leiten Potentiale und Möglichkeiten für die Messe München ab.
- Sie tragen eigene Ergebnisverantwortung im Rahmen der mit den übrigen Bereichen abgestimmten Budgetplanung.
- Sie arbeiten eng mit der Geschäftsführung und Führungskräften aus den Messeprojekten und Zentralbereichen zusammen, insbesondere mit der Unternehmensstrategie, IT und Marketing.

**Ihre Qualifikation:**

- Sie verfügen über ein abgeschlossenes Studium im Bereich Wirtschaftswissenschaften oder Wirtschaftsinformatik oder eine vergleichbare Qualifikation.
- Sie haben mehrjährige Führungserfahrung, insbesondere in der Steuerung digitaler Projektteams und besitzen die unternehmerische Fähigkeit, auch komplexe Projekte und Programme zum Erfolg zu führen.
- Ihre ausgeprägte Fähigkeit, innovative Geschäftsmodelle mit strategischem Weitblick zu konzipieren und überzeugend zu kommunizieren, zeichnet Sie aus.
- Sie beeindrucken durch Ihren Erfolg im Aufbau neuer Geschäftsfelder und in der Vermarktung digitaler Produkte und Services (Websites, Apps, Communities, Matchmaking-Plattformen).
- Sie bringen außerdem ein tiefes Verständnis von Kundenbedürfnissen hinsichtlich digitaler Lösungen mit und verstehen es, diese in den von Ihnen verantworteten Produkten und Services auf den Punkt zu adressieren.

Sie teilen die Leidenschaft für das digitale Geschäft und brennen auf diese Aufgabe? Dann sind Sie unser Kandidat.

Wenn Sie mehr wollen als einen Job, dann starten Sie besser gleich bei uns!

Eine Tätigkeit bei der Messe München ist Ihre ganz persönliche Eintrittskarte in die aufregende Welt des internationalen Messe- und Kongressmanagements - mit all ihren vielfältigen Tätigkeiten und Entwicklungschancen. Wenn Ihnen zudem der Umgang mit Menschen liegt, und Sie gerne im Team arbeiten, informieren wir Sie gerne über Ihre Möglichkeiten.

Wir bieten Ihnen ein vielseitiges Betätigungsfeld, leistungsgerechte Bezahlung verbunden mit attraktiven Sozialleistungen und Weiterbildungsmöglichkeiten sowie einen zukunftsorientierten Arbeitsplatz in einem expandierenden und internationalen Unternehmensumfeld.

Die Messe München fördert aktiv die Gleichstellung aller Mitarbeiterinnen und Mitarbeiter. Wir begrüßen deshalb Bewerbungen von Frauen und Männern, unabhängig von deren kultureller und sozialer Herkunft, Alter, Religion, Weltanschauung, Behinderung oder sexueller Identität.

Interessiert? Dann freuen wir uns über Ihre Online-Bewerbung mit der Angabe des frühesten Eintrittstermins und Ihrer Gehaltsvorstellung.

Stand der Anzeige: 25.04.16

[Drucken](#)

[Online bewerben](#)

Die folgenden Inserate wurden auf Grund ihrer Zusätze von der Analyse ausgenommen:

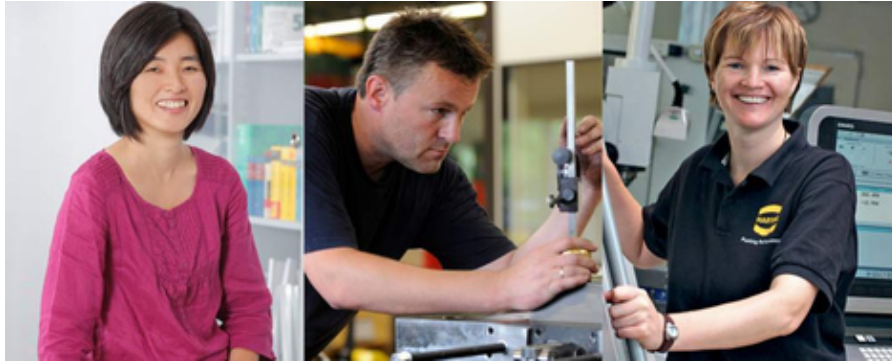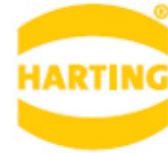

Pushing Performance

## Für unseren Hauptsitz in Espelkamp suchen wir Sie als Referent (m/w) Chief Digital Officer

---

### Ihre Aufgaben

- Unterstützung bei der Entwicklung der digitalen HARTING Gesamtstrategie
- Leitung bzw. aktive Mitarbeit an komplexen und zukunftsgerichteten digitalen Projekten
- Recherchen und konzeptionelle Arbeit für den Bereich Corporate Digital Transformation
- Vor- und Nachbereitung von Besprechungen und Präsentationen
- Organisation des Bereichs CDT sowie selbstständige Terminplanung und -koordination
- Allgemeine Assistenz- und Administrationsaufgaben

### Ihr Profil

- Abgeschlossenes Studium im Bereich International Business
- Erfahrung in der Strategieentwicklung und -umsetzung
- Praktische Erfahrung im Umgang mit unterschiedlichen Kulturen
- Kenntnisse im Innovationsmanagement bzw. alternativ im Design Thinking
- Englische Sprachkenntnisse in Wort und Schrift
- MS Office Kenntnisse und Erfahrung in statistischen Verfahren (SPSS)

People | Power | Partnership

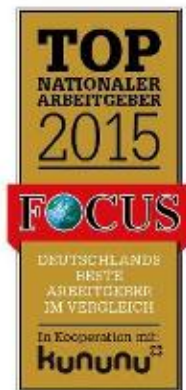

Die HARTING Technologiegruppe in Ostwestfalen ist weltweit marktführend in der elektrischen und elektronischen Netzwerk- und Verbindungstechnik. Rund 4.200 Mitarbeitende in 51 Vertriebs- und Produktionsstätten stehen für die Internationalität von HARTING.

Als Familienunternehmen tragen wir für unsere Mitarbeitenden Fürsorge und unterstützen sie u. a. durch eine flexible Arbeitszeitgestaltung und ein qualifiziertes Gesundheitsmanagement.

HARTING KGaA | Marienwerderstraße 3 | 32339 Espelkamp | Klaus Grünkemeier | [jobs@HARTING.com](mailto:jobs@HARTING.com)

Wir freuen uns auf Ihre [Onlinebewerbung!](#)

[www.Karriere.HARTING.de](http://www.Karriere.HARTING.de)

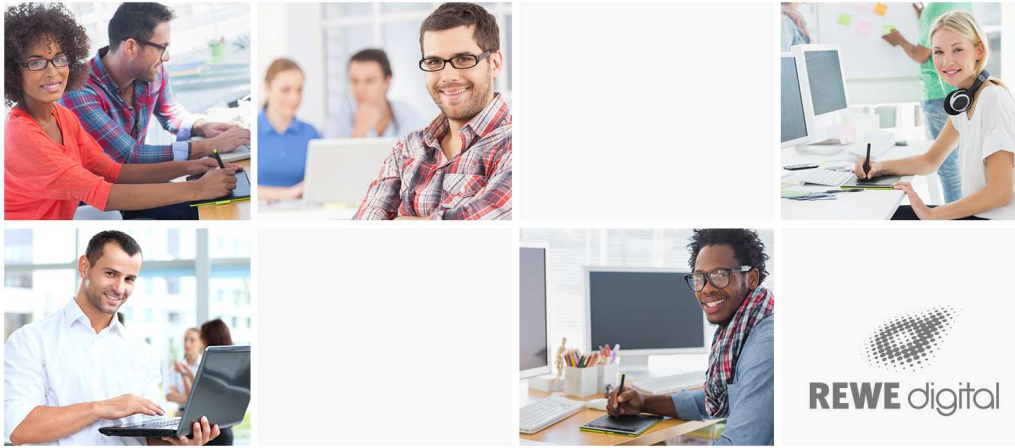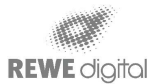

**Einsatzort:** 51063 Köln  
**Eintrittsdatum:** ab sofort  
**Beschäftigungsart:** Vollzeit  
**Job ID:** ST-53885065A  
**Veröffentlichung:** 21.04.2016

Die REWE Group ist einer der führenden Handels- und Touristikkonzerne in Europa. Unser Jahresumsatz beträgt über 52 Milliarden Euro. Im In- und Ausland beschäftigen wir rund 330.000 Mitarbeiter und Mitarbeiterinnen. Zu unseren wichtigsten Marken gehören REWE, Penny, Billa, Merkur, BIPA, ITS, DER, Meier's Weltreisen, Jahn Reisen und Toom Baumarkt. In unserer neu geschaffenen und stark wachsenden Einheit REWE Digital in Köln bündeln wir alle strategischen Online-Aktivitäten der REWE Group. Wir wollen der führende Anbieter von Online-Lösungen in allen für uns relevanten Märkten werden.

## Referent des Chief Digital Officers (m/w)

### Das erwartet Sie bei uns:

- Begleitung des Aufbaus der neuen Einheit Rewe Digital sowie der Transformation der Rewe Group und ihrer Einheiten in die digitale Welt
- Koordination der funktionalen Experten von Rewe Digital aus den Bereichen Operations, Technologie und digital Marketing bei der digitalen Transformation der Rewe International AG, des Toom Baumarkt und der DER Touristik
- Information des Chief Digital Officers bzgl. Entwicklung der digitalen Projekte und Geschäftstätigkeiten der Einheiten der Rewe Group
- Vorbereitung und Durchführung interne und externe Veranstaltungen mit Kollegen von Rewe Digital, den Einheiten der Rewe Group und externen Parteien
- Unterstützung Chief Digital Officer bei Vorbereitung von internen und externen Präsentationen / Reden
- Unterstützung Chief Digital Officer bei der Vorbereitung der Abstimmung mit Rewe Group Vorständen und Aufsichtsräten
- Mitarbeit an strategischen Projekten

### Das bringen Sie mit:

- Erfolgreich abgeschlossenes wirtschaftswissenschaftliches Hochschulstudium (Uni/FH)
- 1-3 Jahre fundierte Berufserfahrung in einer Unternehmensentwicklungs-Position oder Top-Managementberatung
- Sehr gute Fachkenntnisse in Methoden und Fragestellungen in schnell wachsenden Organisationen
- Idealerweise Branchenerfahrung in den Bereichen LEH, Baumarkt und/oder Touristik
- Fundierte Projektmanagementenerfahrung im eCommerce Bereich
- Verhandlungssicher Englischkenntnisse und interkulturelles Geschick
- Sicherer Umgang mit MS Excel und MS Powerpoint
- Ausgeprägte Fertigkeiten in der Präsentation von Ergebnissen und Entscheidungsvorlagen
- Analytischer, performanceorientierter Arbeitsstil, viel Drive und Leidenschaft, um mit uns Geschichte zu schreiben

### Das bieten wir Ihnen:

- Aktive Aufbauarbeit in einem der aktuell spannendsten Digitalprojekte eines führenden Handels- und Touristikunternehmens in Europa
- Dynamische Start-up-Atmosphäre mit allen Vorteilen des o. g. führenden Handelsunternehmens
- Flache Hierarchien und kurze Entscheidungswege

Wir freuen uns auf Ihre aussagekräftigen Bewerbungsunterlagen unter Angabe Ihres frühestmöglichen Eintrittstermins und Ihrer Gehaltsvorstellung.

### Ansprechpartner:

REWE Digital GmbH

Stefan Leinasser  
 Schanzenstr. 6-20  
 51063 Köln

---

[➔ Jetzt online bewerben](#)

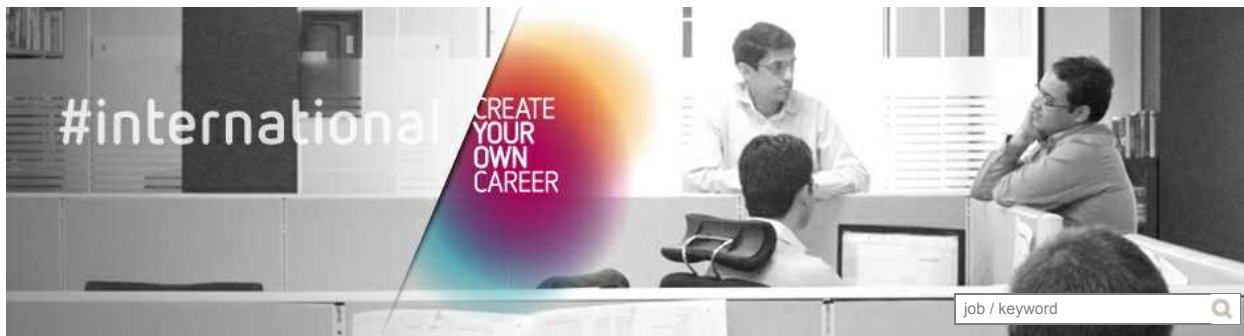

Inserat 13\_Executive Assistant CDO\_Verlagswesen\_Bertelsmann 29.4.2016 via UN-Website

» Home » Job Search

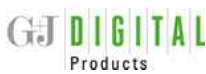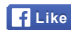

ID:260492

## Executive Assistant to the Chief Digital Officer (m/w)

Professional, Full Time, Limited, Internet / Online / New Media, Internet / Online / New Media, Assistant, G+J Digital Products GmbH, Hamburg, Hamburg

G+J Digital ist der Bereich für sämtliche digitalen Aktivitäten innerhalb des Verlagshauses Gruner + Jahr. Unsere Mission ist es, „Best in Class“ digitale Produkte für unsere Nutzer sowie Vermarktungsplattformen für unsere Partner zu entwickeln. Unser Fokus liegt dabei auf Mobile.

Im Rahmen dieser Mission erstellen wir auf der einen Seite Content-, Community- und Commerce-Produkte (z.B. Stern, Brigitte, Gala, Chefkoch, roomido und delinero) und betreiben auf der anderen Seite digitale Vermarktungsplattformen (Ligatus und trnd). Diese beiden Geschäftsfelder stärken wir durch Zukäufe (M&A und Digital Ventures) und unser Innovationslabor (Greenhouse).

Am Standort Hamburg sucht die G+J Digital Products GmbH ab sofort (zunächst befristet auf 2 Jahre) einen

### Executive Assistant (m/w) to the Chief Digital Officer

Diese Aufgaben warten auf Dich

- Du unterstützt den CDO sowohl im Tagesgeschäft als auch bei übergreifenden strategischen Themen
- Zu deinen Aufgaben gehören Projektmanagement, die Erstellung von Strategiedokumenten und -präsentationen sowie die Kommunikation mit anderen Bereichen/Unternehmen von G+J, Bertelsmann und externen Partnern
- Du arbeitest sehr eng mit den Geschäftsführungs-Büros, den Führungskräften im Digitalbereich und den zentralen Geschäftsbereichen (Finance, Controlling, Unternehmenskommunikation) zusammen
- Du bist in alle strategisch relevanten Entscheidungen im Digitalbereich von Gruner + Jahr eingebunden und unterstützt den CDO mit Analysen, Auswertungen und einer eigenen Sichtweise und Bewertung zu digitalen Themen
- Neben Aufgaben im klassischen digitalen Markengeschäft (digitale Markenauftritte von Stern, Brigitte, Gala und weiteren) wirst du in Tätigkeiten rund um Chefkoch, interne G+J Startups, Ligatus, trnd, digitale Akquisitionen und das Innovationslabor Greenhouse aktiv eingebunden und bewertest die Zukunftsfähigkeit digitaler Geschäftsmodelle und deren Relevanz für Gruner + Jahr

> Recommend page on Facebook

SHARE CONTENT

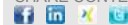

#### JOBSEARCH

Country

All results

Division

All results

Full Text Search

Search

> Advanced JobSearch

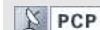

> Forgot Password?

Log In

> New Users Click Here

> Submit Resume

> Save Job to My PCP

> Request a Referral

> Referral Help

#### Explore, Recommend and Share

> Recommend this Job

> Search for Gruner + Jahr

> Recommend this Job

> People you may know at Gruner + Jahr

> Tweet this Job

> Search for Gruner + Jahr

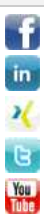

## Das bringst Du mit

- Überdurchschnittlich abgeschlossenes Hochschulstudium in Wirtschaftsinformatik, Wirtschaftsingenieurwesen, BWL oder Medienmanagement
- Ausgeprägtes analytisches Denkvermögen und starke konzeptionelle Fähigkeiten
- Zeit- und Projektmanagement-Skills sowie die Fähigkeit, viele Themen und Projekte gleichzeitig im Blick zu behalten und zu priorisieren
- Begeisterung für digitale Geschäftsmodelle und die Transformation von Medienhäusern
- Grundlegendes Verständnis für Aufbau und Kennzahlen von Digital Publishing-, Vermarktungs-, Marktplatz- und eCommerce-Modelle
- Tiefes Verständnis für kaufmännische Kennzahlen und Zusammenhänge
- Hohe Belastbarkeit und überdurchschnittliche Einsatzbereitschaft
- Hervorragende Kommunikationsfähigkeit, Flexibilität und Teamfähigkeit
- Selbstständiges Arbeiten und priorisieren. Aufgeschlossenheit und Humor
- Sicherer Umgang mit allen MS-Office-Anwendungen

Neugierig geworden? Isabelle Arnold I(HR) freut sich auf Deine Bewerbung!

- > [Submit Resume](#)
- > [Save Job to My PCP](#)

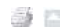



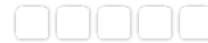

Ref. jobup.ch: 1176689 | Firmen-Referenz: J3504 | Date: 13 Nov 2015

**Chief Digital Officer**  
1201 Genève

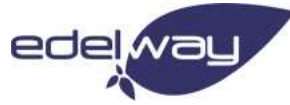

Edelway SA is a leading pan-European IT Recruitment Company serving large global multinationals in Europe.

We are now looking to hire on a long term basis a Chief Digital Officer to integrate the teams of our global multinational client in Geneva/Lausanne area on a long term basis. An excellent package is on offer for the right person. Fluent English is required. French is a plus.

You will be responsible for all the Global Digital programs and report directly to the CIO.

**Chief Digital Officer**

The role:

- Define international digital strategy of the group according to business objectives.
- Create digital brand platforms with the marketing teams (Consumer insight, CRM content & services)
- Define with key departments/partners and consulting firms, governance & organization model, tools and roadmap for the digital transformation.
- Create e-commerce recommendations & guidelines and improve media efficiency
- Define segmentation strategy and use big data information to define strategies
- Elaborate media plans & partnerships, create guidelines for countries (SEA, social platforms, video platforms, opinion leaders...), and provide tracking tools and KPI's recommendations. Federate and accompany countries in digital activations.

Education and experience:

- 10 years+ work experience leading IT Digital projects for large multinational organisation
- Experience in digital such as CRM, mobile application, web content
- Distinctive skills stakeholders' management
- Fluent English is mandatory and French is a plus
- Ability to work in a multi-cultural environment

Keywords: Director, Head of, Directeur, Strategy, English, e-marketing, Digital Marketing, Process, Stakeholders management, Consumer insight, trends, Online, Geneva, Lausanne

If this sounds like your next challenge send us your cv at coralyne@edelway.com (+41 58 717 70 35) and we will call you to discuss it in more details. Your application will be strictly confidential.

**Minimal erforderliches Profil:**

- Digital
- Digital Marketing

Jetzt bewerben!

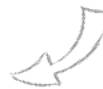

**EDELWAY SA**

**Frau Coralyne Saint-Cirel**

1201 Genève  
Telefonnummer : +41 58 717 70 35  
Email: coralyne@edelway.com  
<http://www.edelway.com>

**Ort:** 1201 Genève

**Anstellungsverhältnis:** Unbefristet 100%

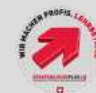

Andere Inserate  
dieser Firma

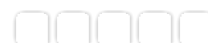



**WENN SIE EINEN JONGLEUR IM ZIRKUS SEHEN,  
DENKEN SIE NUR: „PAH, ANFÄNGER“!  
DENN SIE JONGLIEREN ALLE  
PROJEKTE UND ANFRAGEN MIT LINKS?**

Perfekt! Denn wir suchen einen

## **Personal Assistant Chief Officer Digital & Adjacent (m/w)**

Die ProSiebenSat.1 Group gehört zu den führenden Medienunternehmen Europas. Mit unseren Sendern SAT.1, ProSieben, kabel eins, sixx und SAT.1 Gold faszinieren wir täglich Millionen von Menschen. Zudem versorgt unsere globale Produktions- und Vertriebsgruppe, Red Arrow Entertainment Group, Sender in aller Welt mit einem umfangreichen Programmportfolio. Außergewöhnliche TV-Unterhaltung ist aber nur ein Teil unseres Erfolgskonzeptes. Im Vorstandsbereich Digital & Adjacent bündelt die ProSiebenSat.1 Group auf dem Weg zum digitalen "Entertainment and Commerce Powerhouse" all jene Angebote, mit denen sie ihre starke TV-Welt generisch erweitern kann. Dazu gehören vornehmlich die Bereiche Online-Video, Online-Games, Music sowie Ventures & Commerce.

Andere faszinieren können wir nur, wenn wir selbst fasziniert sind. Deshalb sind unsere "Fascinating People" unser wichtigstes Gut. Die ProSiebenSat.1-Group, das ist eine Gemeinschaft außergewöhnlicher Menschen, mit außergewöhnlichen Talenten und überragenden Leistungen in allen Bereichen unseres Unternehmens. Und da wir uns auf der Suche nach neuen Herausforderungen ständig vorwärts bewegen, braucht unser Team Verstärkung!

### **Das suchen wir**

- Klassische Assistenz- und Office Management-Aufgaben zur aktiven Unterstützung des Vorstands Digital & Adjacent in allen organisatorischen und administrativen Belangen
- Telefon, Post- und E-Mailbearbeitung, Korrespondenz in Deutsch und Englisch
- Ablage und Wiedervorlagemanagement
- Koordination und Organisation von internen und externen Terminen und Meetings
- Betreuung von Geschäftspartnern
- Planung, Koordination und Abrechnung von Dienstreisen
- Rechnungs- und Bestellabwicklung mittels unterschiedlicher IT-Systeme
- Erstellung und Ausarbeitung von Präsentationen und Reports

### **Das bieten Sie**

- Mehrjährige Berufserfahrung im relevanten Assistenzumfeld
- Berufserfahrung im Dienstleistungssektor (Hotellerie etc.) ausdrücklich gewünscht
- Ausgeprägte Serviceorientierung
- Sehr gute Englischkenntnisse in Wort und Schrift
- Sicherer Umgang mit den gängigen MS-Office Anwendungen (Outlook, Word, Excel, PowerPoint) sowie hohe Affinität im Umgang mit modernen Medien
- Flexibilität, Belastbarkeit sowie großes Organisationstalent
- Loyalität, Teamfähigkeit und Kommunikationsstärke

Lust auf ein Gespräch mit Ihren neuen Kollegen?

Dann bewerben Sie sich: [www.prosiebensat1-jobs.com](http://www.prosiebensat1-jobs.com)
